# Supplementary material for: Validation of Vancomycin Area under the Concentration—Time Curve Estimation by the Bayesian Approach Using One-Point Samples for Predicting Clinical Outcomes in Patients with Methicillin-Resistant Staphylococcus aureus Infections
Source: Antibiotics (Basel). 2022 Jan 13;11(1):96. doi: 10.3390/antibiotics11010096 (PMC8772855; doi:10.3390/antibiotics11010096)
Supplement: Supplementary file 1 [file antibiotics-11-00096-s001.zip › antibiotics-1526412-supplementary.pdf]

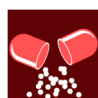

Table S1. Baseline demographics of the enrolled patients

|                                                                         | No. of patients (%)      |                                       |                             |                         |                        |
|-------------------------------------------------------------------------|--------------------------|---------------------------------------|-----------------------------|-------------------------|------------------------|
|                                                                         | Total population (n=260) | High/moderate-risk infections (n=105) | Low-risk infections (n=155) | Vancomycin q12h (n=202) | Vancomycin q24h (n=58) |
| Male                                                                    | 169 (65.0%)              | 69 (65.7%)                            | 100 (64.5%)                 | 125 (61.9%)             | 44 (75.9%)             |
| > 65 years                                                              | 145 (55.8%)              | 59 (56.2%)                            | 86 (55.5%)                  | 100 (49.5%)             | 45 (77.6%)             |
| Body mass index $\geq 25$                                               | 39 (15.0%)               | 19 (18.1%)                            | 20 (12.9%)                  | 27 (13.4%)              | 12 (20.7%)             |
| eGFR < 70 (mL/min/1.73 m <sup>2</sup> )                                 | 48 (18.5%)               | 21 (20.0%)                            | 27 (17.4%)                  | 0 (0.0%)                | 48 (82.8%)             |
| Heart disease                                                           | 77 (29.6%)               | 35 (33.3%)                            | 42 (27.1%)                  | 51 (25.2%)              | 26 (44.8%)             |
| Diabetes mellitus                                                       | 47 (18.1%)               | 18 (17.1%)                            | 29 (18.7%)                  | 38 (18.8%)              | 9 (15.5%)              |
| Collagen disease                                                        | 35 (13.5%)               | 13 (12.4%)                            | 22 (14.2%)                  | 23 (11.4%)              | 12 (20.7%)             |
| Chronic respiratory disease                                             | 30 (11.5%)               | 14 (13.3%)                            | 16 (10.3%)                  | 23 (11.4%)              | 7 (12.1%)              |
| Chronic hepatic dysfunction                                             | 13 (5.0%)                | 6 (5.7%)                              | 7 (4.5%)                    | 10 (5.0%)               | 3 (5.2%)               |
| Malignant tumor                                                         | 119 (45.8%)              | 33 (31.4%)                            | 86 (55.5%)                  | 94 (46.5%)              | 25 (43.1%)             |
| Total parenteral nutrition                                              | 42 (16.2%)               | 19 (18.1%)                            | 23 (14.8%)                  | 33 (16.3%)              | 9 (15.5%)              |
| Serum albumin < 2.5 g/dL                                                | 79 (30.4%)               | 31 (29.5%)                            | 48 (31.0%)                  | 65 (32.2%)              | 14 (24.1%)             |
| Surgery within 28 days                                                  | 105 (40.4%)              | 36 (34.3%)                            | 69 (44.5%)                  | 83 (41.1%)              | 22 (37.9%)             |
| Ventilator use                                                          | 54 (20.8%)               | 48 (45.7%)                            | 6 (3.9%)                    | 42 (20.8%)              | 12 (20.7%)             |
| ICU stay                                                                | 45 (17.3%)               | 36 (34.3%)                            | 9 (5.8%)                    | 34 (16.8%)              | 11 (19.0%)             |
| APACHE II score > 10                                                    | 92 (35.4%)               | 60 (57.1%)                            | 32 (20.6%)                  | 72 (35.6%)              | 20 (34.5%)             |
| Steroid use                                                             | 50 (19.2%)               | 20 (19.0%)                            | 30 (19.4%)                  | 34 (16.8%)              | 16 (27.6%)             |
| Immunosuppressive therapy                                               | 9 (3.5%)                 | 5 (4.8%)                              | 4 (2.6%)                    | 6 (3.0%)                | 3 (5.2%)               |
| Anticancer therapy                                                      | 27 (10.4%)               | 9 (8.6%)                              | 18 (11.6%)                  | 22 (10.9%)              | 5 (8.6%)               |
| Bloodstream infections                                                  | 37 (14.2%)               | 37 (35.2%)                            | 0 (0.0%)                    | 31 (15.3%)              | 6 (10.3%)              |
| VAP                                                                     | 38 (14.6%)               | 38 (36.2%)                            | 0 (0.0%)                    | 31 (15.3%)              | 7 (12.1%)              |
| Bone and joint infections                                               | 36 (13.8%)               | 36 (34.3%)                            | 0 (0.0%)                    | 24 (11.9%)              | 12 (20.7%)             |
| Central nervous system infections                                       | 2 (0.8%)                 | 2 (1.9%)                              | 0 (0.0%)                    | 2 (1.0%)                | 0 (0.0%)               |
| Skin and soft tissue infections                                         | 63 (24.2%)               | 2 (1.9%) *                            | 61 (39.4%)                  | 53 (26.2%)              | 10 (17.2%)             |
| Intra-abdominal infections                                              | 26 (10.0%)               | 0 (0.0%)                              | 26 (16.8%)                  | 19 (9.4%)               | 7 (12.1%)              |
| Urinary tract infections                                                | 8 (3.1%)                 | 1 (1.0%) *                            | 7 (4.5%)                    | 4 (2.0%)                | 4 (6.9%)               |
| Respiratory tract infections except for VAP                             | 68 (26.2%)               | 4 (3.8%) *                            | 64 (41.3%)                  | 52 (25.7%)              | 16 (27.6%)             |
| Piperacillin/tazobactam                                                 | 54 (20.8%)               | 19 (18.1%)                            | 35 (22.6%)                  | 49 (24.3%)              | 5 (8.6%)               |
| Non-steroidal anti-inflammatory drugs                                   | 55 (21.2%)               | 22 (21.0%)                            | 33 (21.3%)                  | 42 (20.8%)              | 13 (22.4%)             |
| Use of contrast medium                                                  | 36 (13.8%)               | 8 (7.6%)                              | 28 (18.1%)                  | 22 (10.9%)              | 14 (24.1%)             |
| Furosemide                                                              | 26 (10.0%)               | 14 (13.3%)                            | 12 (7.7%)                   | 15 (7.4%)               | 11 (19.0%)             |
| Catecholamine                                                           | 21 (8.1%)                | 13 (12.4%)                            | 8 (5.2%)                    | 9 (4.5%)                | 12 (20.7%)             |
| Angiotensin-converting-enzyme inhibitor/Angiotensin II receptor blocker | 37 (14.2%)               | 20 (19.0%)                            | 17 (11.0%)                  | 28 (13.9%)              | 9 (15.5%)              |

\* Complication of bloodstream infections. eGFR: estimated glomerular filtration rate; ICU: intensive care unit; VAP: ventilator-associated pneumonia.
